# Supplementary material for: Grifolin, neogrifolin and confluentin from the terricolous polypore Albatrellus flettii suppress KRAS expression in human colon cancer cells
Source: PubMed Central journal article supplement (PMC7199964; doi:10.1371/journal.pone.0231948), 2020-05-05

Expt 1

Expt 2

DMSO

Confluentin

DMSO

Confluentin

Cleaved  
caspase 3 →

— 75 KDa

— 63 KDa

— 48 KDa

— 35 KDa

— 25 KDa

— 20 KDa

— 17 KDa

— 11 KDa

GAPDH

Raw data for Fig 4C. Blot was first incubated with anti-Cleaved Caspase-3 antibody (left image). Then, reprobred with anti-GAPDH antibody (right images). Two biological replicates are shown.

KRAS

24 hours

48 hours

DMSO

Grifolin

Neogrifolin

Confluentin

x

DMSO

Grifolin

Neogrifolin

Confluentin

75 —  
63 —  
48 —  
35 —  
25 —  
20 —  
17 —

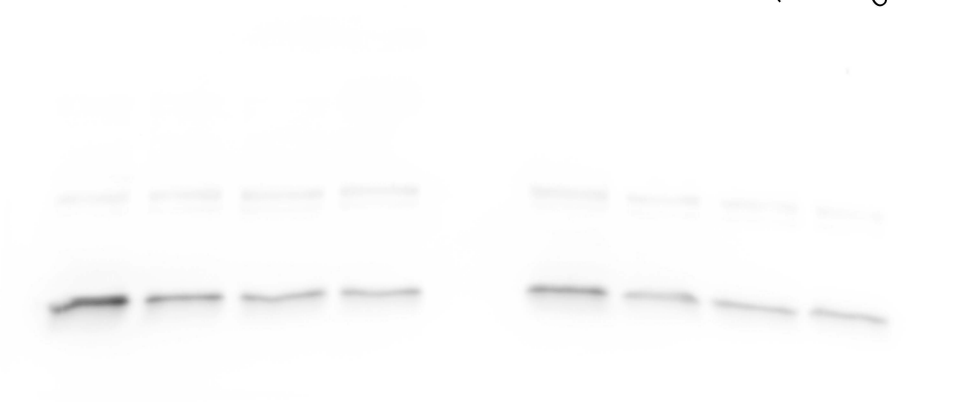

Raw data for Fig 6. Blot was incubated with anti-KRAS antibody



# KRAS

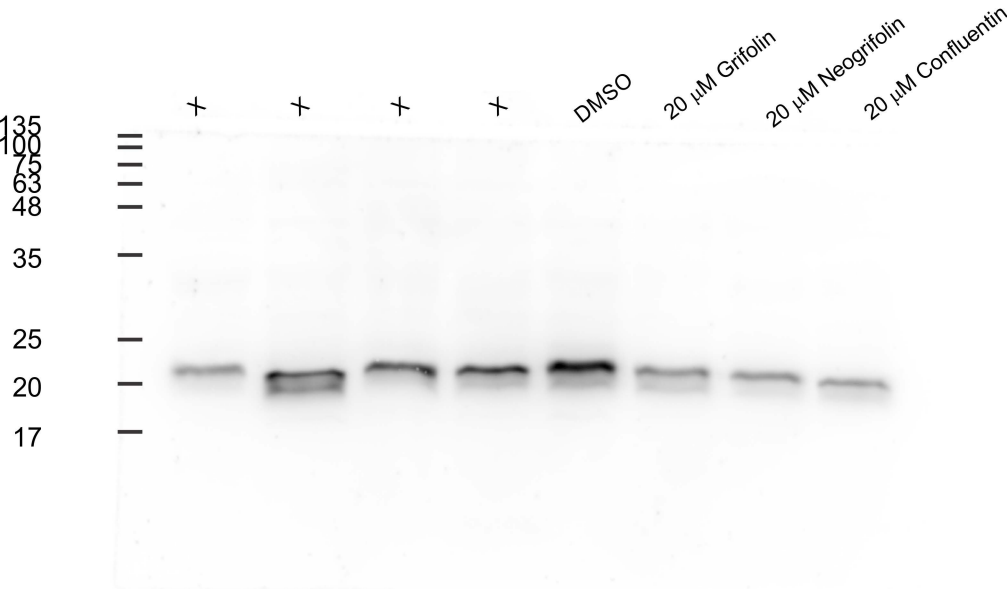

Raw data for S19A Fig. Blot was incubated with anti-KRAS antibody

GAPDH

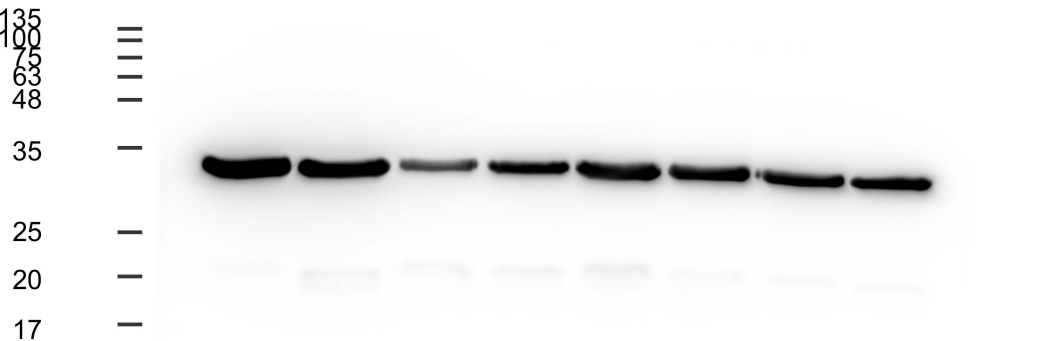

Raw data for S19A Fig. Blot was incubated with anti-GAPDH antibody

# KRAS

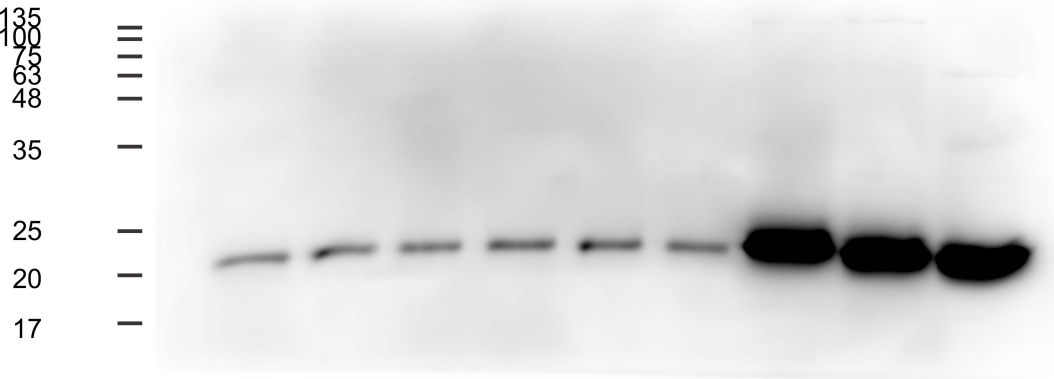

Raw data for S19B Fig. Blot was incubated with anti-KRAS antibody

GAPDH

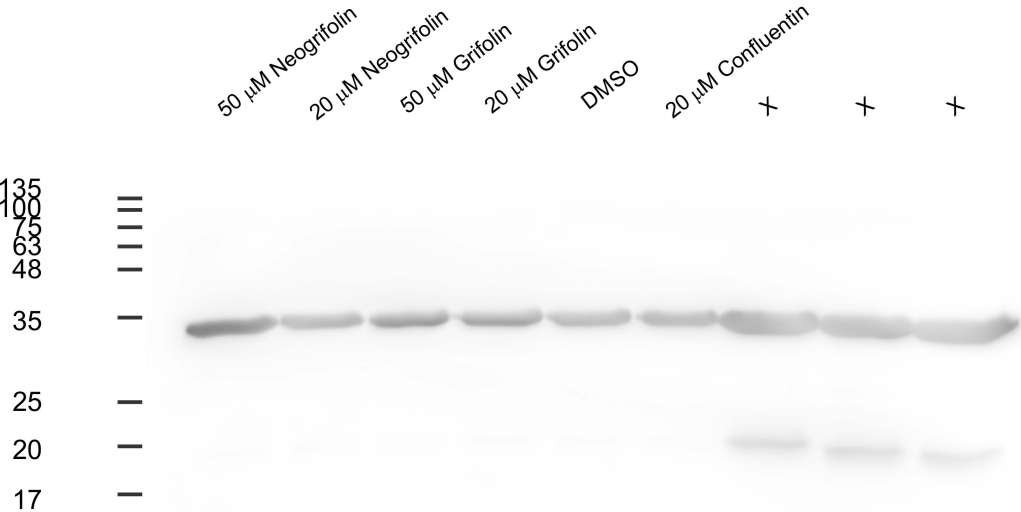

Raw data for S19B Fig. Blot was incubated with anti-GAPDH antibody

Electrophoretic mobility shift assay

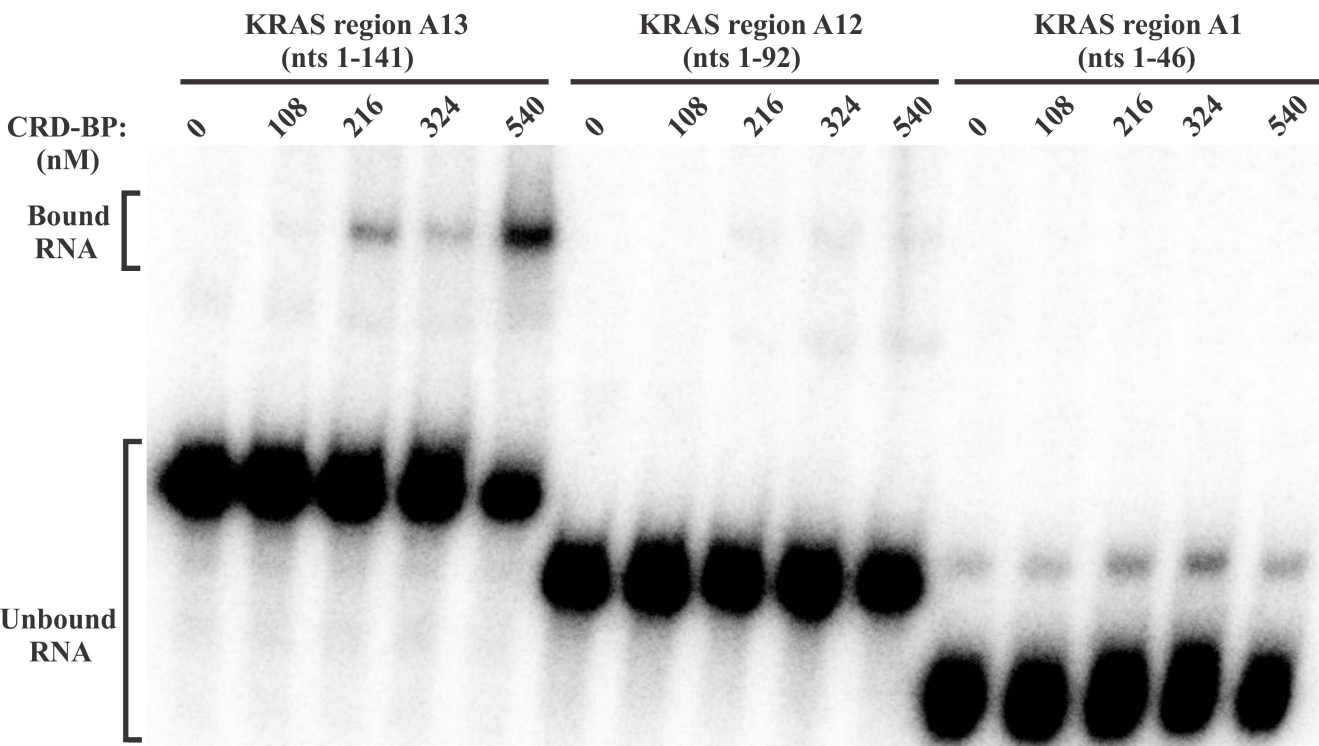



Electrophoretic mobility shift assay

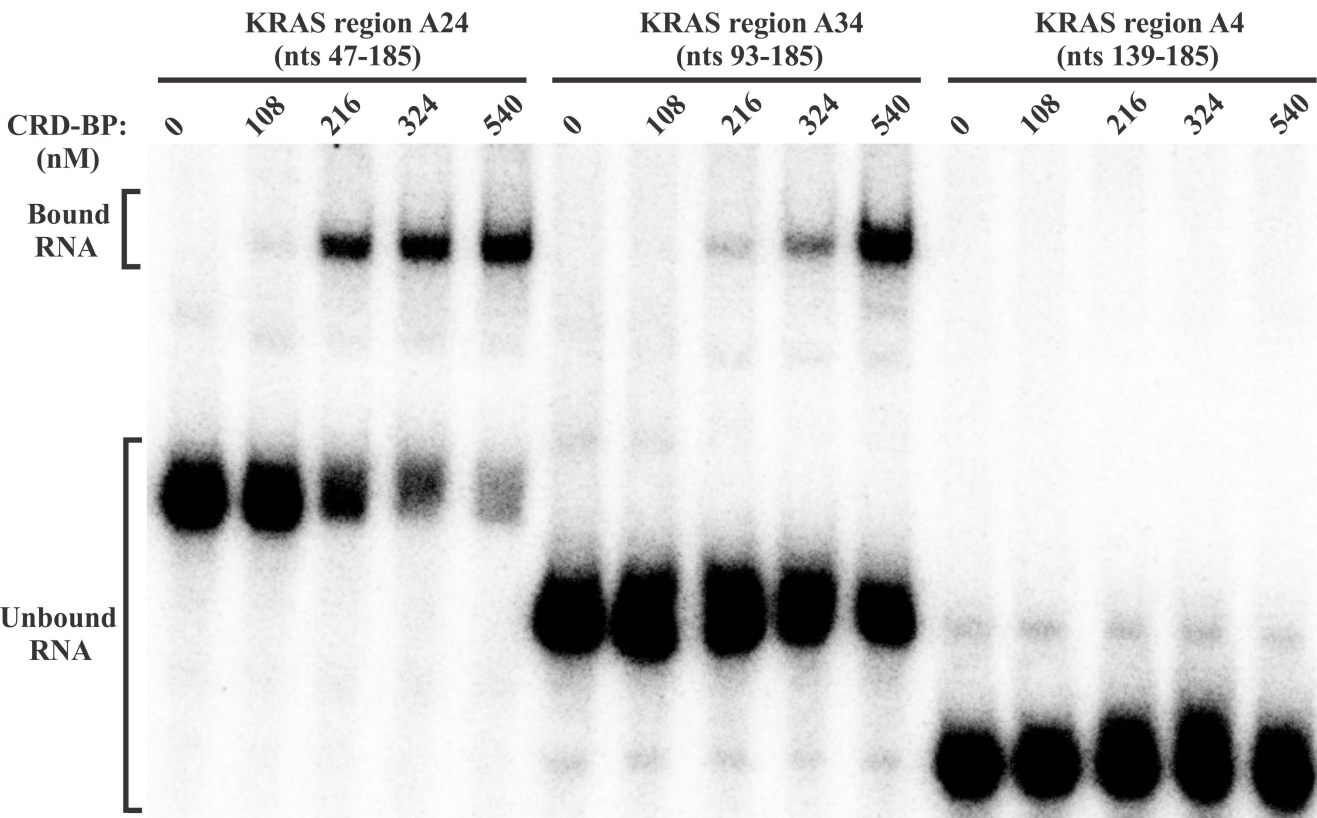

Raw data for S20 B2 Fig.

Electrophoretic mobility shift assay

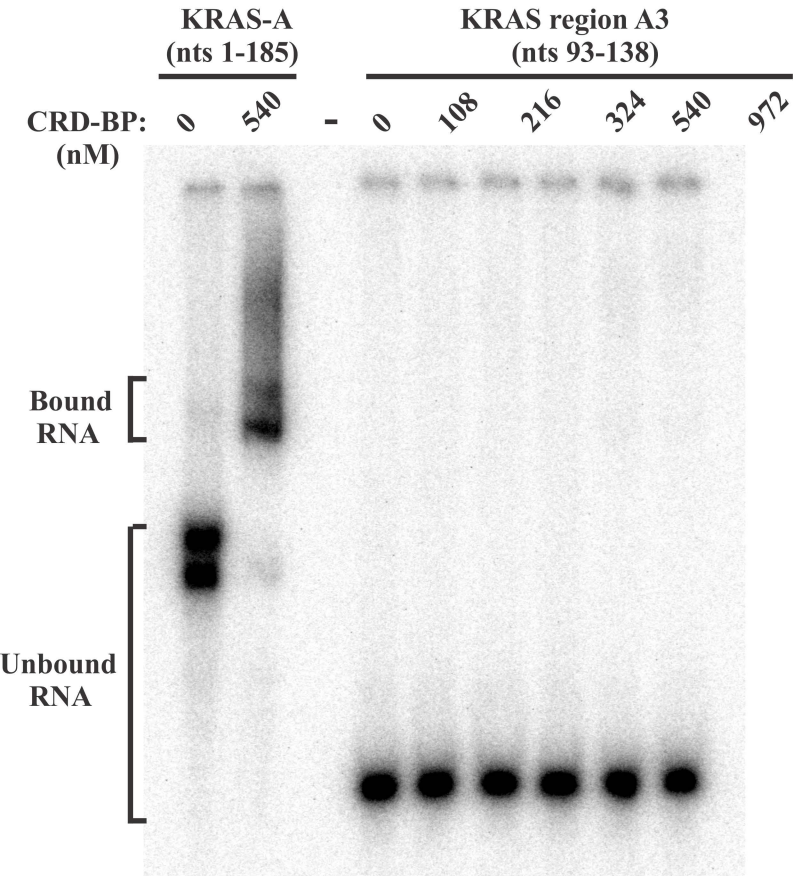

Raw data for S20 B3 Fig.

Electrophoretic mobility shift assay

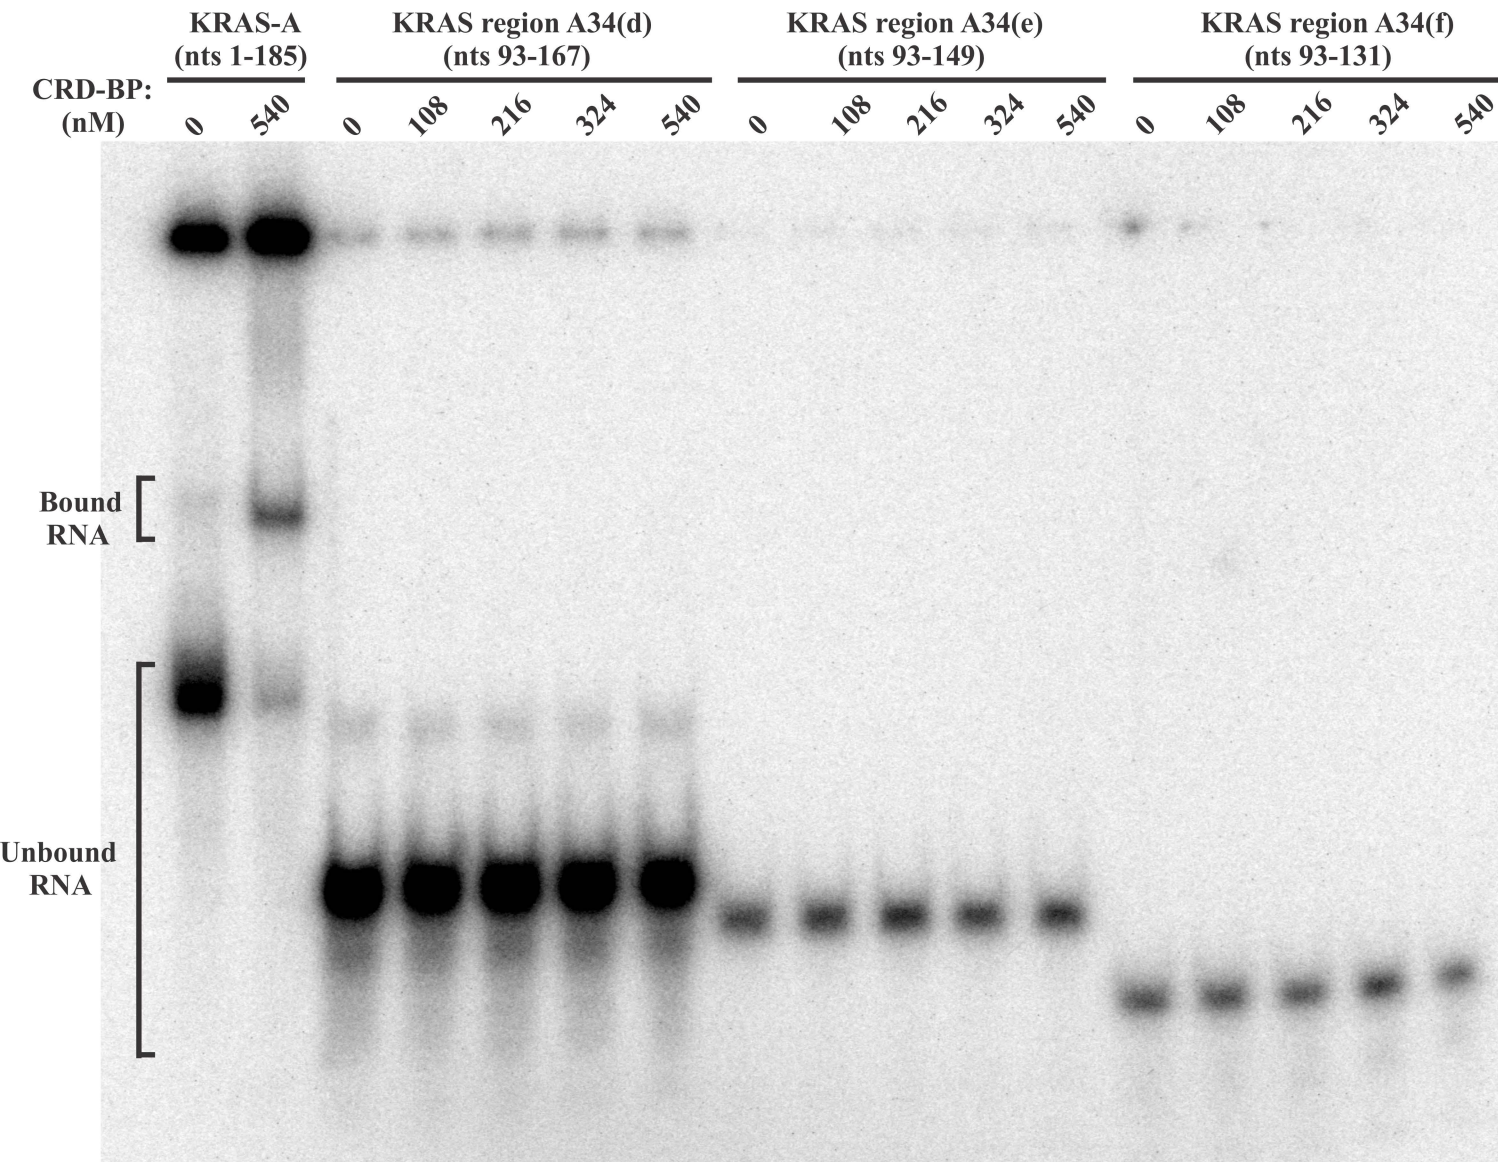

Electrophoretic mobility shift assay

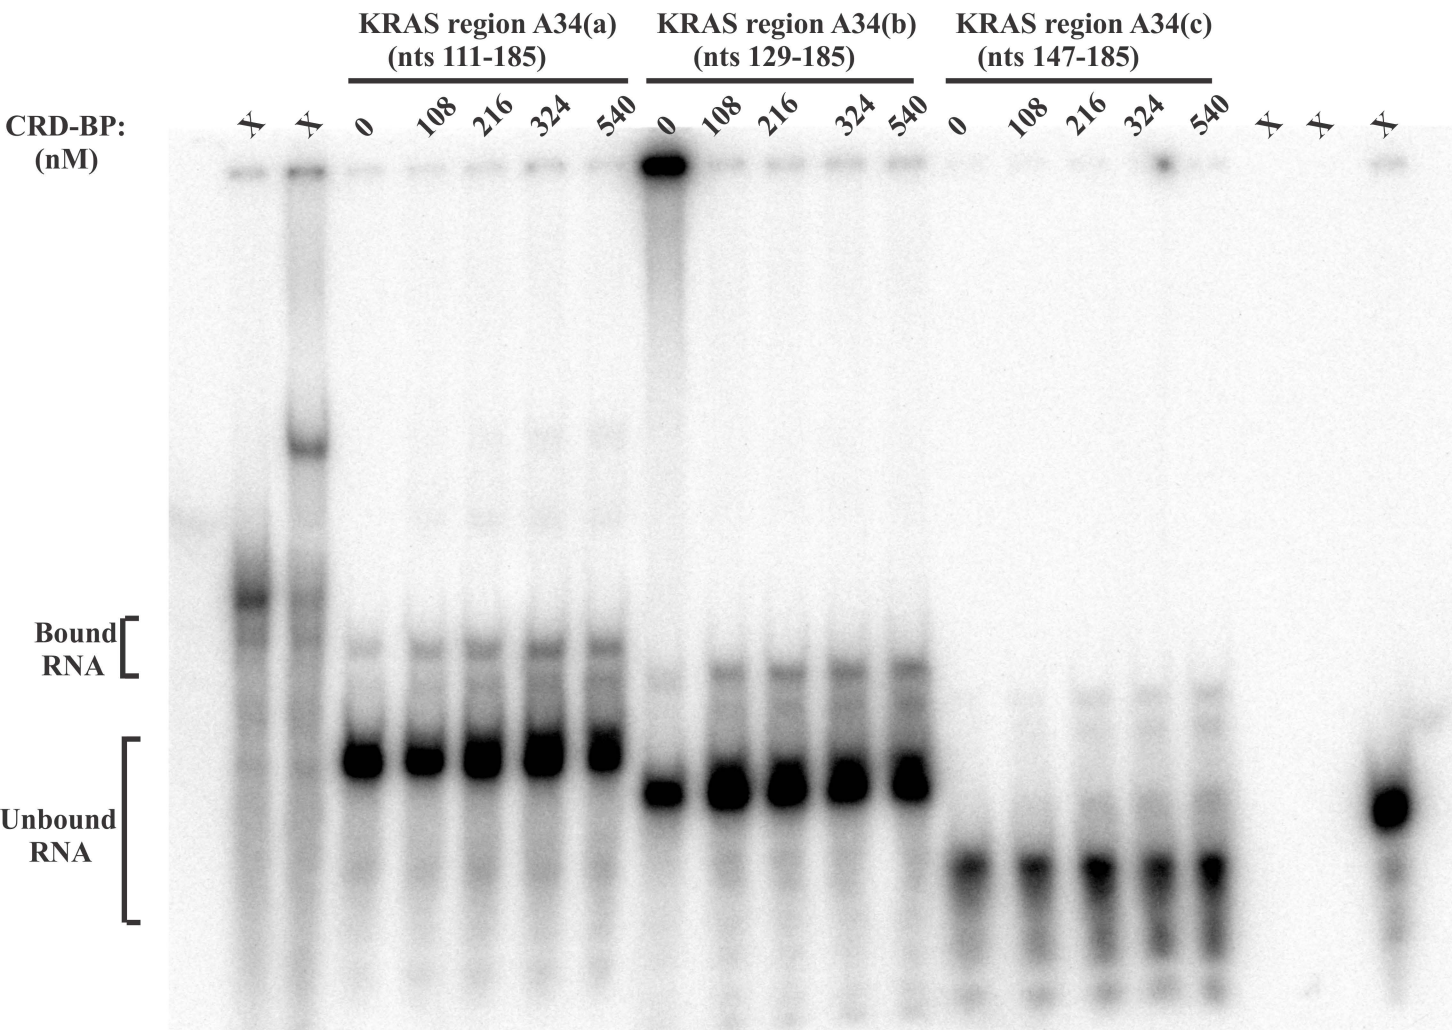

Supplement: pone.0231948.s023.pdf [file pone.0231948.s023.pdf]
